# Supplementary material
Source: PubMed Central journal article supplement (PMC3585053)
Supplement: supp_M112.418376_jbc.M112.418376-2.pdf [file supp_M112.418376_jbc.M112.418376-2.pdf]

**Supplementary information, Table S1** shRNA sequences

| NAMES         | SEQUENCES           |
|---------------|---------------------|
| Control-shRNA | CTTGTGAAGCTTCTAGGAG |
| Ovol2-shRNA-1 | GCATGTGAACAGTGACCAT |
| Ovol2-shRNA-2 | GGAGGACCTGTATCTGCAT |
| Ovol2-shRNA-3 | CCATCCAGGGAGCACATTT |

**Supplementary information, Table S2** Primer sequences (5' → 3') for QPCR

| GENES         | 5' PRIMERS                | 3' PRIMERS                |
|---------------|---------------------------|---------------------------|
| <i>Ovol2</i>  | GATTCACAACCTGTGACCTTTGTG  | GTACGTGCCTCTTCAGGTC       |
| <i>Ovol2A</i> | GGAGAGAGGATCCCACCATG      | GTCGCGGAGCAGACAGCCCAGGCTC |
| <i>Ovol2B</i> | GCCTGGAAGTGGGTGGAA        | TGTGCCCTCGTCTTGCCTC       |
| <i>Ovol2C</i> | GGGCGGATGGCTAGGGTT        | GCCACGGCAGTTTGACC         |
| <i>Rex1</i>   | CAGTTCGTCCATCTAAAAAGGGAGG | TCTTAGCTGCTTCCTGAACAATGCC |
| <i>CRTR1</i>  | ATGCTGTGGAGTTTTTGTGGG     | CAATCTGCACCCGAAAAGGC      |
| <i>Oct4</i>   | AGTTGGCGTGGAGACTTTGC      | CAGGGCTTTCATGTCCTGG       |
| <i>Nanog</i>  | TTGCTTACAAGGGTCTGCTACT    | ACTGGTAGAAGAATCAGGGCT     |
| <i>Sox1</i>   | GCACACAGCGTTTTCTCGG       | ACATCCGACTCCTCTTCCC       |
| <i>Pax6</i>   | GCAGATGCAAAAAGTCCAGGTG    | CAGGTTGCGAAGAACTCTGTTT    |
| <i>Six3</i>   | CCGGAAGAGTTGTCCATGTTC     | CGACTCGTGTTTGTGATGGC      |
| <i>MAP2</i>   | AAAGTTGCCTCCAGTTCCATTT    | TCTTTGATTCCGTGGGCATTT     |
| <i>T</i>      | CTCGGATTCACATCGTGAGAG     | AAGGCTTTAGCAAATGGGTTGTA   |
| <i>Mixl1</i>  | ACGCAGTGCTTTCCAAACC       | CCCGCAAGTGGATGTCTGG       |
| <i>Flk1</i>   | GGGTCGATTTCAAACCTCAATGT   | AGAGTAAAGCCTATCTCGCTGT    |
| <i>Sox17</i>  | CGAGCCAAAGCGGAGTCTC       | TGCCAAGGTCAACGCCTTC       |
| <i>Gata6</i>  | TTGCTCCGGTAACAGCAGTG      | GTGGTCGCTTGTGTAGAAGGA     |
| <i>Gata4</i>  | CCCTACCCAGCCTACATGG       | ACATATCGAGATTGGGGTGTCT    |
| <i>Gapdh</i>  | TGTGATGGGTGTGAACCACGAGAA  | CTGTGGTCATGAGCCCTTCCACAA  |

**Supplementary information, Table S3** Primer sequences (5' → 3') for ChIP assay

| NAMES | 5' PRIMER               | 3' PRIMER             |
|-------|-------------------------|-----------------------|
| BRE   | CAAGGTAGGGTGTCTGACTCTGC | TGCAGGAGTGGCGGGCTAGTC |
| Ctrl  | GACCACCGAGATTCCAGAAA    | ACAAGCCACAGGTTCTCTGC  |
